# Supplementary material
Source: MDPI journal article supplement (https://www.mdpi.com/2076-3263/9/5/237)
Supplement: s1 [file s1]

| group                 | predictor        | % contribution<br>HUB3 | % contribution<br>HUB4-6<br>no<br>substrate | % contribution<br>HUB4-6<br>with substrate | % contribution<br>Mytilus edulis<br>no substrate | % contribution<br>Mytilus edulis<br>with substrate | % contribution<br>model average<br>no substrate | % contribution<br>model average<br>with substrate |
|-----------------------|------------------|------------------------|---------------------------------------------|--------------------------------------------|--------------------------------------------------|----------------------------------------------------|-------------------------------------------------|---------------------------------------------------|
|                       |                  |                        |                                             |                                            |                                                  |                                                    |                                                 |                                                   |
| obia_spectral_texture | obia_pca2        | 17,4                   | 11,8                                        | 0,9                                        | 34,3                                             | 0,5                                                | 21,2                                            | 0,7                                               |
| eucl_dist             | reefbpi_eucldist | 7,3                    | 4,7                                         | 1,4                                        | 3,7                                              | 0,8                                                | 5,2                                             | 1,1                                               |
| bs                    | bsmedian         | 6,5                    | 2,4                                         | 0,8                                        | 2,9                                              | 0,4                                                | 3,9                                             | 0,6                                               |
| bs_char               | bs_arachar       | 2,8                    | 4,9                                         | 1,4                                        | 3,1                                              | 0,6                                                | 3,6                                             | 1,0                                               |
| terrain_50cm1m        | terr50cm1m_pca1  | 2,3                    | 2,5                                         | 1,0                                        | 5,6                                              | 0,5                                                | 3,5                                             | 0,8                                               |
| depth                 | depth            | 4,4                    | 3,8                                         | 3,7                                        | 2,1                                              | 0,8                                                | 3,4                                             | 2,3                                               |
| terrain_scale_bpi     | bpiscale_pca1    | 1,9                    | 3,3                                         | 2,2                                        | 2,6                                              | 0,9                                                | 2,6                                             | 1,5                                               |
| terrain_scale_aspect  | aspectscale_pca3 | 2,6                    | 3,6                                         | 2,1                                        | 1,3                                              | 0,5                                                | 2,5                                             | 1,3                                               |
| bs                    | bsmean           | 3,5                    | 2,2                                         | 1,1                                        | 0,9                                              | 0,3                                                | 2,2                                             | 0,7                                               |
| obia_shape            | obia_area        | 2,6                    | 1,9                                         | 2,0                                        | 2,0                                              | 1,0                                                | 2,2                                             | 1,5                                               |
| bs_scale              | bsscale_pca2     | 2,6                    | 2,4                                         | 1,6                                        | 1,4                                              | 0,5                                                | 2,1                                             | 1,0                                               |
| eucl_dist             | fsand_eucldist   | 2,3                    | 2,7                                         | 1,8                                        | 1,3                                              | 0,6                                                | 2,1                                             | 1,2                                               |
| bs_stat               | bsstat_pca1      | 2,1                    | 2,3                                         | 1,4                                        | 1,7                                              | 0,6                                                | 2,0                                             | 1,0                                               |
| sedthick              | sandthick        | 1,4                    | 2,6                                         | 1,1                                        | 2,1                                              | 0,3                                                | 2,0                                             | 0,7                                               |
| obia_spectral_texture | obia_pca5        | 3,6                    | 1,4                                         | 1,2                                        | 1,0                                              | 0,4                                                | 2,0                                             | 0,8                                               |
| terrain_scale_aspect  | aspectscale_pca2 | 1,6                    | 2,7                                         | 2,1                                        | 1,1                                              | 1,3                                                | 1,8                                             | 1,7                                               |
| terrain_5m            | terr5m_pca1      | 1,3                    | 2,1                                         | 1,0                                        | 2,0                                              | 1,0                                                | 1,8                                             | 1,0                                               |
| terrain_5m            | terr5m_pca3      | 1,3                    | 2,3                                         | 1,3                                        | 1,6                                              | 0,3                                                | 1,7                                             | 0,8                                               |
| terrain_scale_aspect  | aspectscale_pca1 | 1,9                    | 2,2                                         | 2,1                                        | 1,0                                              | 0,8                                                | 1,7                                             | 1,4                                               |
| terrain_scale_bpi     | bpiscale_pca4    | 1,4                    | 1,9                                         | 1,2                                        | 1,9                                              | 1,0                                                | 1,7                                             | 1,1                                               |
| obia_shape            | obia_formfactor  | 1,4                    | 2,3                                         | 1,5                                        | 1,4                                              | 0,4                                                | 1,7                                             | 0,9                                               |
| bs_scale              | bsscale_pca1     | 1,5                    | 1,6                                         | 1,0                                        | 1,8                                              | 0,6                                                | 1,7                                             | 0,8                                               |
| xy                    | x_local          | 2,2                    | 1,9                                         | 1,7                                        | 0,8                                              | 0,4                                                | 1,7                                             | 1,0                                               |
| terrain_scale_aspect  | aspectscale_pca4 | 2,0                    | 1,7                                         | 1,6                                        | 1,2                                              | 0,8                                                | 1,6                                             | 1,2                                               |
| terrain_50cm1m        | terr50cm1m_pca2  | 1,3                    | 2,2                                         | 1,4                                        | 1,3                                              | 0,9                                                | 1,6                                             | 1,2                                               |
| ocean                 | salinity         | 1,0                    | 2,5                                         | 2,2                                        | 1,3                                              | 0,6                                                | 1,6                                             | 1,4                                               |
| terrain_5m            | terr5m_pca2      | 1,5                    | 2,1                                         | 1,7                                        | 1,0                                              | 0,3                                                | 1,5                                             | 1,0                                               |
| terrain_5m            | terr5m_pca4      | 1,3                    | 1,2                                         | 1,3                                        | 2,1                                              | 0,7                                                | 1,5                                             | 1,0                                               |
| terrain_scale_slope   | terrscale_pca1   | 1,9                    | 1,4                                         | 1,7                                        | 1,2                                              | 0,5                                                | 1,5                                             | 1,1                                               |
| bs_stat               | bsstat_pca2      | 1,0                    | 1,9                                         | 1,6                                        | 1,6                                              | 0,6                                                | 1,5                                             | 1,1                                               |
| xy                    | y_local          | 2,0                    | 1,6                                         | 1,4                                        | 0,9                                              | 0,6                                                | 1,5                                             | 1,0                                               |
| obia_shape            | obia_direction   | 0,8                    | 2,3                                         | 1,7                                        | 1,4                                              | 0,7                                                | 1,5                                             | 1,2                                               |
| terrain_50cm1m        | terr50cm1m_pca4  | 1,9                    | 1,6                                         | 1,0                                        | 0,9                                              | 0,4                                                | 1,5                                             | 0,7                                               |
| terrain_50cm1m        | terr50cm1m_pca3  | 1,3                    | 1,5                                         | 0,9                                        | 1,4                                              | 0,5                                                | 1,4                                             | 0,7                                               |
| ocean                 | bcurrent_vel     | 1,4                    | 1,8                                         | 1,8                                        | 1,0                                              | 0,5                                                | 1,4                                             | 1,1                                               |
| terrain_50cm1m        | terr50cm1m_pca5  | 1,7                    | 1,6                                         | 1,2                                        | 0,8                                              | 0,4                                                | 1,4                                             | 0,8                                               |
| terrain_scale_slope   | terrscale_pca3   | 0,9                    | 1,6                                         | 1,1                                        | 1,5                                              | 0,3                                                | 1,3                                             | 0,7                                               |
| uncertainty           | uncertbs_nadir   | 1,0                    | 1,4                                         | 1,2                                        | 1,4                                              | 1,0                                                | 1,3                                             | 1,1                                               |
| terrain_scale_slope   | terrscale_pca4   | 1,4                    | 1,2                                         | 0,8                                        | 1,1                                              | 0,6                                                | 1,2                                             | 0,7                                               |
| terrain_scale_slope   | terrscale_pca2   | 0,8                    | 1,0                                         | 0,6                                        | 1,8                                              | 0,8                                                | 1,2                                             | 0,7                                               |
| uncertainty           | uncertd_stdev    | 0,9                    | 1,7                                         | 1,1                                        | 0,6                                              | 0,3                                                | 1,1                                             | 0,7                                               |

|                                    |                        |   |   |      |   |      |   |      |
|------------------------------------|------------------------|---|---|------|---|------|---|------|
| substrate_models                   | hardb_pebbel *         | - | - | 12,9 | - | 58,0 | - | 35,5 |
| substrate_models                   | boulders_200_600mm     | - | - | 11,5 | - | 8,9  | - | 10,2 |
| substrate_models                   | large_stones_60_200mm  |   |   | 4,0  |   | 1,0  |   | 2,5  |
| substrate_models                   | stones_pebbles_20_60mm | - | - | 3,6  | - | 0,7  | - | 2,2  |
| substrate_models                   | large_boulders_600mm   | - | - | 2,3  | - | 1,7  | - | 2,0  |
| substrate_models                   | hard_clay              | - | - | 1,4  | - | 1,4  | - | 1,4  |
| substrate_models                   | sand_0.06.2mm          | - | - | 1,5  | - | 1,3  | - | 1,4  |
| substrate_models                   | silt_0.002_0.06mm      | - | - | 1,7  | - | 0,9  | - | 1,3  |
| substrate_models                   | gravel_2_20mm          | - | - | 0,9  | - | 1,0  | - | 1,0  |
| substrate_models                   | sand_clay_2mm          | - | - | 0,0  | - | 0,2  | - | 0,1  |
| substrate_models                   | hub3                   | - | - | 0,2  | - | 0,0  | - | 0,1  |
| substrate_models                   | sediment_grabs**       | - | - | 0,0  | - | 0,0  | - | 0,0  |
| total substrate model contribution |                        |   |   | 40,2 |   | 75,2 |   |      |

\* hardb\_pebbel is the sum of all hardbottom components and pebbels

\*\* multinomial model of thematic sedimentclasses using expert interpreted sedimentsamples (n=434)
