# Supplementary material
Source: MDPI journal article supplement (https://www.mdpi.com/2076-3263/9/5/237)
Supplement: s1 [file s1]

| group       | predictor                       | scale                                | number | source data | pca (yes/no) | tool          | description                                                     |
|-------------|---------------------------------|--------------------------------------|--------|-------------|--------------|---------------|-----------------------------------------------------------------|
| bs          | bsmax                           | 50cm                                 | 1      | bs mosaic   | n            | FMGT, ArcMap  | aggregated to 5m from 50cm mosaic                               |
| bs          | bsmean                          | 50cm                                 | 1      | bs mosaic   | n            | FMGT, ArcMap  | aggregated to 5m from 50cm mosaic                               |
| bs          | bsmedian                        | 5m                                   | 1      | bs mosaic   | n            | FMGT, ArcMap  | aggregated to 5m from 50cm mosaic                               |
| bs          | bsmin                           | 50cm                                 | 1      | bs mosaic   | n            | FMGT, ArcMap  | aggregated to 5m from 50cm mosaic                               |
| bs_char     | BS_ARA_Characterization_fixed   | 40m                                  | 1      | bs raw      | n            | FMGT          | geocoder                                                        |
| bs_geoc     | BS_Stat_10thPercentile_fixed    | 40m                                  | 1      | bs raw      | y            | FMGT          | geocoder                                                        |
| bs_geoc     | BS_Stat_25thPercentile_fixed    | 40m                                  | 1      | bs raw      | y            | FMGT          | geocoder                                                        |
| bs_geoc     | BS_Stat_75thPercentile_fixed    | 40m                                  | 1      | bs raw      | y            | FMGT          | geocoder                                                        |
| bs_geoc     | BS_Stat_90thPercentile_fixed    | 40m                                  | 1      | bs raw      | y            | FMGT          | geocoder                                                        |
| bs_geoc     | BS_Stat_Kurtosis_fixed          | 40m                                  | 1      | bs raw      | y            | FMGT          | geocoder                                                        |
| bs_geoc     | BS_Stat_M3_fixed                | 40m                                  | 1      | bs raw      | y            | FMGT          | geocoder                                                        |
| bs_geoc     | BS_Stat_M4_fixed                | 40m                                  | 1      | bs raw      | y            | FMGT          | geocoder                                                        |
| bs_geoc     | BS_Stat_Maximum_fixed           | 40m                                  | 1      | bs raw      | y            | FMGT          | geocoder                                                        |
| bs_geoc     | BS_Stat_Mean_fixed              | 40m                                  | 1      | bs raw      | y            | FMGT          | geocoder                                                        |
| bs_geoc     | BS_Stat_Median_fixed            | 40m                                  | 1      | bs raw      | y            | FMGT          | geocoder                                                        |
| bs_geoc     | BS_Stat_Minimum_fixed           | 40m                                  | 1      | bs raw      | y            | FMGT          | geocoder                                                        |
| bs_geoc     | BS_Stat_Mode_fixed              | 40m                                  | 1      | bs raw      | y            | FMGT          | geocoder                                                        |
| bs_geoc     | BS_Stat_QuartileRange_fixed     | 40m                                  | 1      | bs raw      | y            | FMGT          | geocoder                                                        |
| bs_geoc     | BS_Stat_StandardDeviation_fixed | 40m                                  | 1      | bs raw      | y            | FMGT          | geocoder                                                        |
| bs_geoc_ara | BS_ARA_Distance_fixed           | 40m                                  | 1      | bs raw      | y            | FMGT          | geocoder                                                        |
| bs_geoc_ara | BS_ARA_FluidFactor_fixed        | 40m                                  | 1      | bs raw      | y            | FMGT          | geocoder                                                        |
| bs_geoc_ara | BS_ARA_Gradient_fixed           | 40m                                  | 1      | bs raw      | y            | FMGT          | geocoder                                                        |
| bs_geoc_ara | BS_ARA_Impedance_fixed          | 40m                                  | 1      | bs raw      | y            | FMGT          | geocoder                                                        |
| bs_geoc_ara | BS_ARA_Intercept_fixed          | 40m                                  | 1      | bs raw      | y            | FMGT          | geocoder                                                        |
| bs_geoc_ara | BS_ARA_MeanFar_fixed            | 40m                                  | 1      | bs raw      | y            | FMGT          | geocoder                                                        |
| bs_geoc_ara | BS_ARA_MeanNear_fixed           | 40m                                  | 1      | bs raw      | y            | FMGT          | geocoder                                                        |
| bs_geoc_ara | BS_ARA_MeanOuter_fixed          | 40m                                  | 1      | bs raw      | y            | FMGT          | geocoder                                                        |
| bs_geoc_ara | BS_ARA_MeanOuter_fixed2         | 40m                                  | 1      | bs raw      | y            | FMGT          | geocoder                                                        |
| bs_geoc_ara | BS_ARA_MeanTotal_fixed          | 40m                                  | 1      | bs raw      | y            | FMGT          | geocoder                                                        |
| bs_geoc_ara | BS_ARA_NearCh0_fixed            | 40m                                  | 1      | bs raw      | y            | FMGT          | geocoder                                                        |
| bs_geoc_ara | BS_ARA_Phi_fixed                | 40m                                  | 1      | bs raw      | y            | FMGT          | geocoder                                                        |
| bs_geoc_ara | BS_ARA_Roughness_fixed          | 40m                                  | 1      | bs raw      | y            | FMGT          | geocoder                                                        |
| bs_geoc_ara | BS_ARA_Volume_fixed             | 40m                                  | 1      | bs raw      | y            | FMGT          | geocoder                                                        |
| bs_scale    | bs                              | 20m, 50m, 100m, 200m, 500m, 1km, 2km | 7      | bs mosaic   | y            | FMGT, Matlab  | gaussian lowpass filtered backscatter mosaic                    |
| bs_stat     | bsrange                         | 50cm                                 | 1      | bs mosaic   | y            | FMGT, ArcMap  | aggregated to 5m from 50cm mosaic                               |
| bs_stat     | bsstdev3x3                      | 50cm, 1m, 5m                         | 3      | bs mosaic   | y            | FMGT, ArcMap  | aggregated to 5m from 50cm mosaic                               |
| bs_stat     | bsstdev5x5                      | 50cm                                 | 1      | bs mosaic   | y            | FMGT, ArcMap  | aggregated to 5m from 50cm mosaic                               |
| depth       | depth                           | 5m                                   | 1      | depth       | n            | Caris         |                                                                 |
| depth_scale | depth                           | 20m, 50m, 100m, 200m, 500m, 1km, 2km | 7      | depth       | y            | Caris, Matlab | gaussian lowpass filtered 5m depth grid                         |
| eucl_dist   | fsand_eucl_dist                 | 2.5m                                 | 1      | bs          | n            | ArcMap        | distance from backscatter interval classified as sand           |
| eucl_dist   | reef_eucl_dist                  | 2.5m                                 | 1      | depth       | n            | ArcMap        | distance from bpi >=2 inner radius 2.5 m, outer radius 25m      |
| obia_shape  | Area                            | 2.5m                                 | 1      | depth, bs   | n            | ENVI FX       | segmented 6 band pca compressed image using seg 12 and merge 25 |
| obia_shape  | Compactness                     | 2.5m                                 | 1      | depth, bs   | n            | ENVI FX       | "                                                               |
| obia_shape  | Convexity                       | 2.5m                                 | 1      | depth, bs   | n            | ENVI FX       | "                                                               |
| obia_shape  | Elongation                      | 2.5m                                 | 1      | depth, bs   | n            | ENVI FX       | "                                                               |
| obia_shape  | Form_Factor                     | 2.5m                                 | 1      | depth, bs   | n            | ENVI FX       | "                                                               |
| obia_shape  | Length                          | 2.5m                                 | 1      | depth, bs   | n            | ENVI FX       | "                                                               |
| obia_shape  | Main_Direction                  | 2.5m                                 | 1      | depth, bs   | n            | ENVI FX       | "                                                               |
| obia_shape  | Major_Length                    | 2.5m                                 | 1      | depth, bs   | n            | ENVI FX       | "                                                               |
| obia_shape  | Minor_Length                    | 2.5m                                 | 1      | depth, bs   | n            | ENVI FX       | "                                                               |
| obia_shape  | Number_of_Holes                 | 2.5m                                 | 1      | depth, bs   | n            | ENVI FX       | "                                                               |

|                      |                            |                                      |                      |   |                |                                                       |
|----------------------|----------------------------|--------------------------------------|----------------------|---|----------------|-------------------------------------------------------|
| obia_shape           | Rectangular_Fit            | 2.5m                                 | 1 depth, bs          | n | ENVI FX        | "                                                     |
| obia_shape           | Roundness                  | 2.5m                                 | 1 depth, bs          | n | ENVI FX        | "                                                     |
| obia_shape           | Solid_Area                 | 2.5m                                 | 1 depth, bs          | n | ENVI FX        | "                                                     |
| obia_shape           | Solidity                   | 2.5m                                 | 1 depth, bs          | n | ENVI FX        | "                                                     |
| obia_spectral        | Spectral_Max Band 1-6      | 2.5m                                 | 6 depth, bs          | y | ENVI FX        | "                                                     |
| obia_spectral        | Spectral_Mean Band 1-6     | 2.5m                                 | 6 depth, bs          | y | ENVI FX        | "                                                     |
| obia_spectral        | Spectral_Min Band 1-6      | 2.5m                                 | 6 depth, bs          | y | ENVI FX        | "                                                     |
| obia_spectral        | Spectral_Std Band 1-6      | 2.5m                                 | 6 depth, bs          | y | ENVI FX        | "                                                     |
| obia_texture         | Texture_Entropy Band 1-6   | 2.5m                                 | 6 depth, bs          | y | ENVI FX        | "                                                     |
| obia_texture         | Texture_Mean Band 1-6      | 2.5m                                 | 6 depth, bs          | y | ENVI FX        | "                                                     |
| obia_texture         | Texture_Range Band 1-6     | 2.5m                                 | 6 depth, bs          | y | ENVI FX        | "                                                     |
| obia_texture         | Texture_Variance Band 1-6  | 2.5m                                 | 6 depth, bs          | y | ENVI FX        | "                                                     |
| ocean                | bottom_cur_dir             | 50m                                  | 1 insitu uvobs       | n | R, ArcMap      | interpolated dropcamera sensor data using kriging     |
| ocean                | bottom_cur_speed1          | 50m                                  | 1 insitu uvobs       | n | R, ArcMap      | interpolated dropcamera sensor data using kriging     |
| ocean                | bottom_oxy_conc            | 50m                                  | 1 insitu uvobs       | n | R, ArcMap      | interpolated dropcamera sensor data using kriging     |
| ocean                | bottom_salinity            | 50m                                  | 1 insitu uvobs       | n | R, ArcMap      | interpolated dropcamera sensor data using kriging     |
| sedthick             | sandthick                  | 50m                                  | 1 interp sed profile | n | mdps, ArcMap   | interpreted kriging interpolated sediment profiles    |
| terrain_50cm1m       | curv                       | 50cm, 1m                             | 2 depth              | y | ArcMap         | terrain metrics for 50cm and 1m resolution depth grid |
| terrain_50cm1m       | curvplan                   | 50cm, 1m                             | 2 depth              | y | ArcMap         | terrain metrics for 50cm and 1m resolution depth grid |
| terrain_50cm1m       | curvprof                   | 50cm, 1m                             | 2 depth              | y | ArcMap         | terrain metrics for 50cm and 1m resolution depth grid |
| terrain_50cm1m       | curvrangle                 | 50cm, 1m                             | 2 depth              | y | ArcMap         | terrain metrics for 50cm and 1m resolution depth grid |
| terrain_50cm1m       | slope                      | 50cm, 1m                             | 2 depth              | y | ArcMap         | terrain metrics for 50cm and 1m resolution depth grid |
| terrain_50cm1m       | slopeslope                 | 50cm, 1m                             | 2 depth              | y | ArcMap         | terrain metrics for 50cm and 1m resolution depth grid |
| terrain_50cm1m       | stdev                      | 50cm, 1m                             | 2 depth              | y | ArcMap         | terrain metrics for 50cm and 1m resolution depth grid |
| terrain_50cm1m       | stdevrange                 | 50cm                                 | 1 depth              | y | ArcMap         | terrain metrics for 50cm and 1m resolution depth grid |
| terrain_50cm1m       | surfplan                   | 1m                                   | 1 depth              | y | ArcMap         | terrain metrics for 50cm and 1m resolution depth grid |
| terrain_50cm1m       | terrainrug                 | 50cm, 1m                             | 2 depth              | y | ArcMap         | terrain metrics for 50cm and 1m resolution depth grid |
| terrain_5m           | curv                       | 5m                                   | 1 depth              | y | ArcMap         | terrain metrics for 50cm and 1m resolution depth grid |
| terrain_5m           | curvplan                   | 5m                                   | 1 depth              | y | ArcMap         | terrain metrics for 50cm and 1m resolution depth grid |
| terrain_5m           | curvprof                   | 5m                                   | 1 depth              | y | ArcMap         | terrain metrics for 50cm and 1m resolution depth grid |
| terrain_5m           | slope                      | 5m                                   | 1 depth              | y | ArcMap         | terrain metrics for 50cm and 1m resolution depth grid |
| terrain_5m           | slopeslope                 | 5m                                   | 1 depth              | y | ArcMap         | terrain metrics for 50cm and 1m resolution depth grid |
| terrain_5m           | stdev                      | 5m                                   | 1 depth              | y | ArcMap         | terrain metrics for 50cm and 1m resolution depth grid |
| terrain_5m           | surfplan                   | 5m                                   | 1 depth              | y | ArcMap         | terrain metrics for 50cm and 1m resolution depth grid |
| terrain_5m           | terrainrug                 | 5m                                   | 1 depth              | y | ArcMap         | terrain metrics for 50cm and 1m resolution depth grid |
| terrain_scale_aspect | aspect_cos                 | 20m, 200m, 1km, 2km                  | 4 depth              | y | Matlab, ArcMap | gaussian lowpass filtered 5m depth grid               |
| terrain_scale_aspect | aspect_sin                 | 20m, 200m, 1km, 2km                  | 4 depth              | y | Matlab, ArcMap | gaussian lowpass filtered 5m depth grid               |
| terrain_scale_bpi    | bpi                        | 20m, 50m, 100m, 200m, 500m, 1km, 2km | 7 depth              | y | Matlab, ArcMap | gaussian lowpass filtered 5m depth grid               |
| terrain_scale_bpi    | bpi_2m25m                  | 2.5m                                 | 1 depth              | y | ArcMap         | 2.5m inner radius, 25m outer radius                   |
| terrain_scale_slope  | slope                      | 20m, 50m, 100m, 200m, 500m, 1km, 2km | 7 depth              | y | Matlab, ArcMap | gaussian lowpass filtered 5m depth grid               |
| terrain_scale_slope  | slpslp                     | 20m, 50m, 100m, 200m, 500m, 1km, 2km | 7 depth              | y | Matlab, ArcMap | gaussian lowpass filtered 5m depth grid               |
| uncertainty          | bs_nadir_euclidist         | 5m                                   | 1 bs raw             | n | ArcMap         |                                                       |
| uncertainty          | BS_Stat_NumOfSamples_fixed | 5m                                   | 1 bs raw             | n | FMGT           |                                                       |
| uncertainty          | depth_stdeverror           | 5m                                   | 1 depth raw          | n | Caris          |                                                       |
| uncertainty          | depth_uncertainty          | 5m                                   | 1 depth raw          | n | Caris          |                                                       |
| xy                   | x_local                    | 5m                                   | 1 gis                | n | ArcMap         |                                                       |
| xy                   | y_local                    | 5m                                   | 1 gis                | n | ArcMap         |                                                       |
