# Supplementary material
Source: MDPI journal article supplement (https://www.mdpi.com/2076-3263/9/5/237)
Supplement: s1 [file s1]

## protected areas

n2000 area

## helcom hub level 1-6

- rock and boulder
- hard clay
- coarse sediment
- sand
- mixed
- characterised by perennial algae
- dominated by perennial filamentous algae
- characterised by epibenthic bivalves
- dominated by mytilidae
- characterised by cnidarians
- dominated by cnidarians
- characterised by moss animals
- characterised by annual algae
- dominated by annual algae
- mixed epibenthic community
- sparse epibenthic community
- no epibenthic community

## nature 2000

- reef
- sandbank
- flat reef, geogenic
- flat reef, mussels >10%, geogenic
- rock & boulder reef, geogenic
- rock & boulder reef, mussels >10%, geogenic
- ridge reef, geogenic
- ridge reef, mussels >10%, geogenic
- clay reef, geogenic
- clay reef, mussels >10%, geogenic
- sandbank, ripples
- sandbank, mussels <10%, ripples
- sandbank, no ripples
- sandbank, mussels <10%, no ripples

## uncertainty stdev

- 10%
- 0%

## substrate cover

- absent
- present

- 100%
- 0%

## biological cover

- absent
- present

- 100%
- 0%

## djup

- High : -10.3791
- Low : -62.884

HOBURGS BANK HABITAT MAPPING PROJECT

A collaboration between the Swedish Geological Survey (SGU) & the Agency for Marine and Water Management (SwAM)

Project manager SGU Gustav Kärgsten, Project manager SwAM Angelina Olsson

Drawn by Gustav Kärgsten, Draw date 20181009, Survey date 2016-2017

Havs  
och  
Vatten  
myndigheten  
SGU  
Sveriges geologiska undersökning

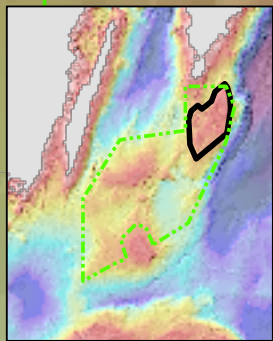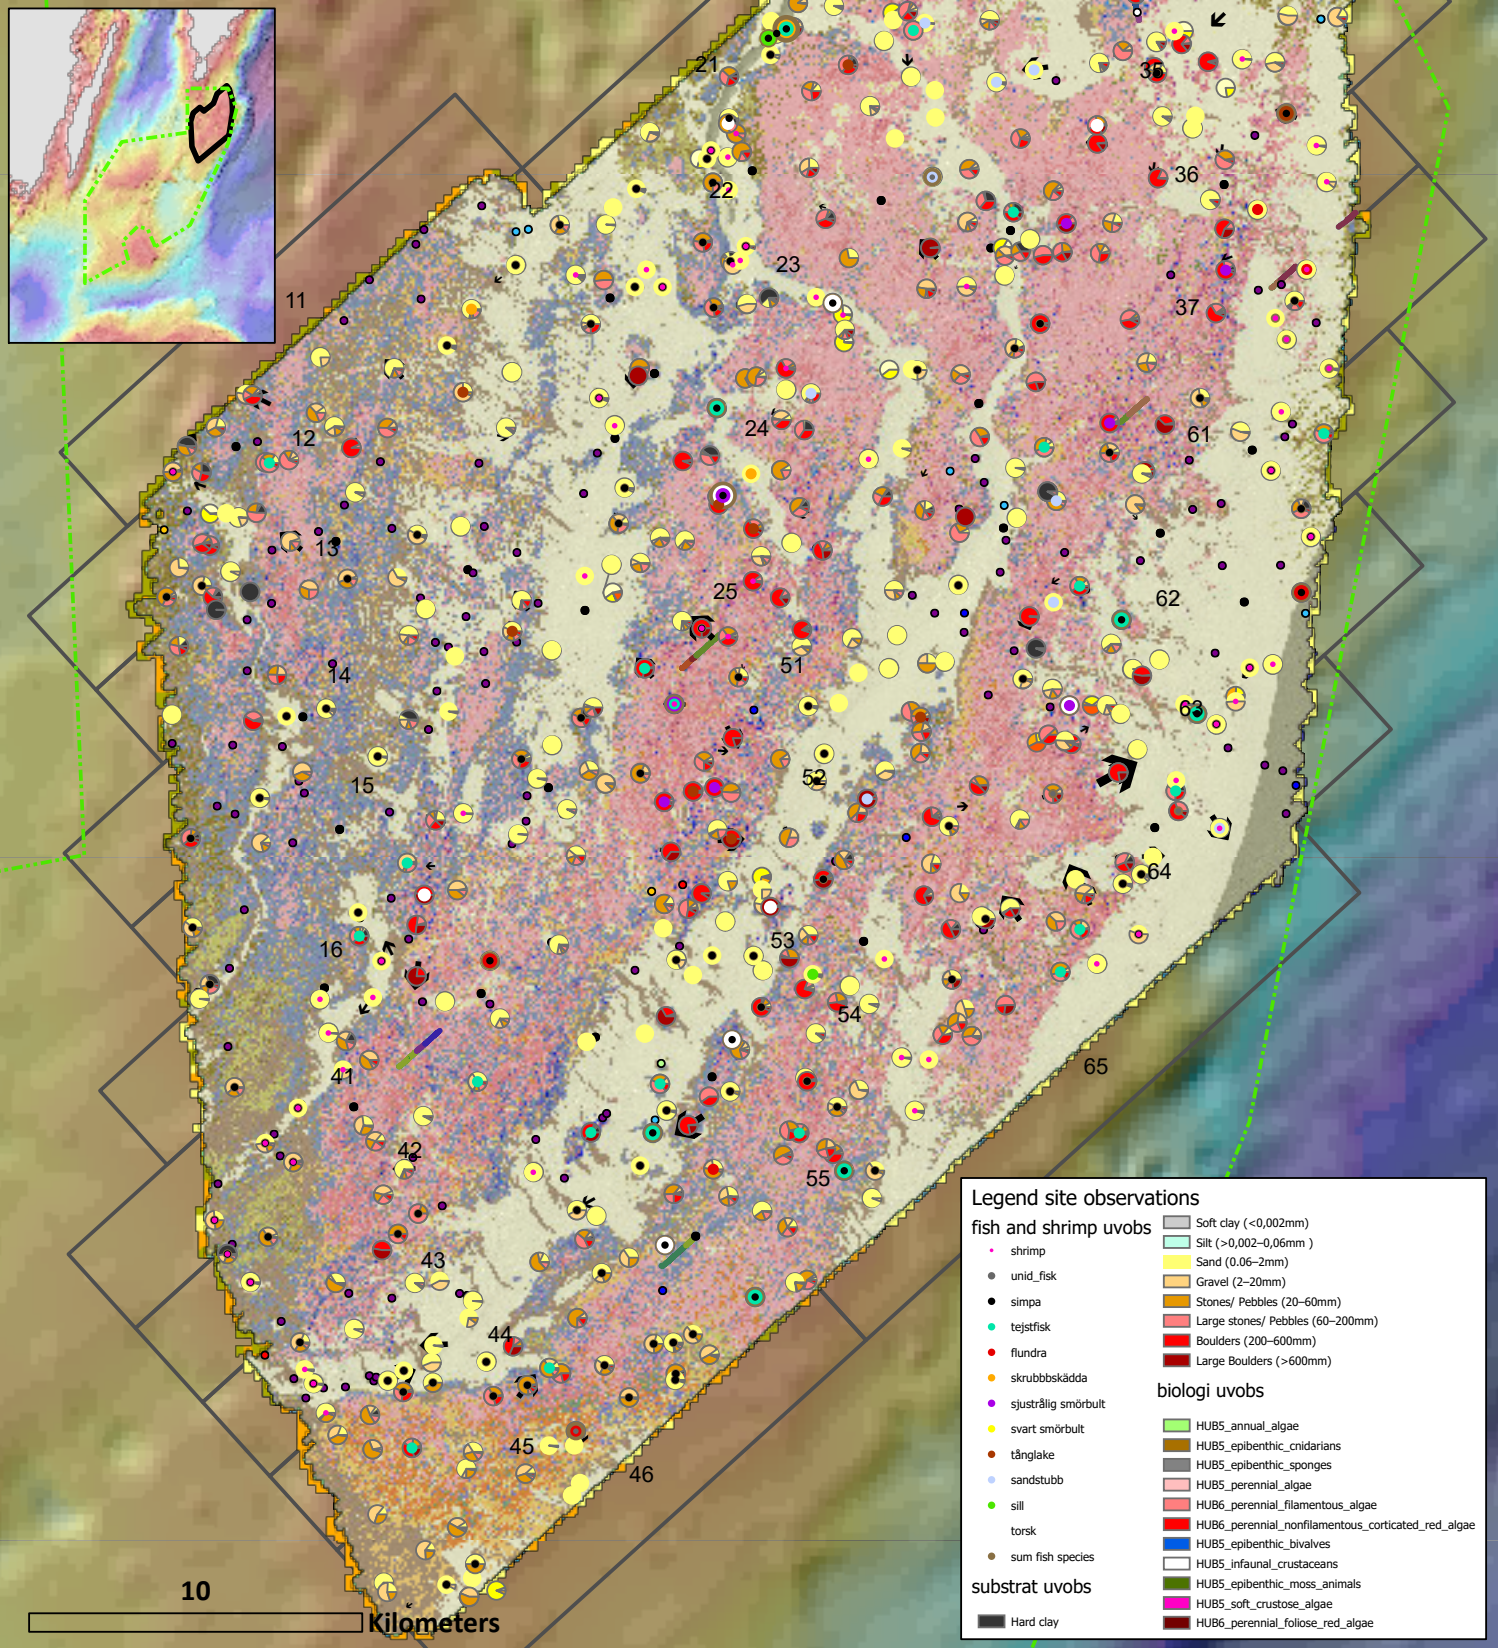

## Legend site observations

### fish and shrimp uvoobs

- shrimp
- unid\_fisk
- simpa
- tejstfisk
- flundra
- skrubbskädda
- sjustrålig smörbult
- svalt smörbult
- tånglake
- sandstubb
- sill
- torsk
- sum fish species

### substrat uvoobs

- Hard clay

- Soft clay (<0,002mm)
- Silt (>0,002-0,06mm)
- Sand (0,06-2mm)
- Gravel (2-20mm)
- Stones/ Pebbles (20-60mm)
- Large stones/ Pebbles (60-200mm)
- Boulders (200-600mm)
- Large Boulders (>600mm)

### biologi uvoobs

- HUB5\_annual\_algae
- HUB5\_epibenthic\_cnidarians
- HUB5\_epibenthic\_sponges
- HUB5\_perennial\_algae
- HUB6\_perennial\_filamentous\_algae
- HUB6\_perennial\_nonfilamentous\_corticated\_red\_algae
- HUB5\_epibenthic\_bivalves
- HUB5\_infaunal\_crustaceans
- HUB5\_epibenthic\_moss\_animals
- HUB5\_soft\_crustose\_algae
- HUB6\_perennial\_foliose\_red\_algae
