# Supplementary material
Source: MDPI journal article supplement (https://www.mdpi.com/2076-3263/9/5/237)
Supplement: s1 [file s1]

## Legend

### HELCOM HUB 1-6

#### Code & Name

|                                                                                    |         |                                                                         |
|------------------------------------------------------------------------------------|---------|-------------------------------------------------------------------------|
|    | AA.A1C  | Baltic photic rock and boulder characterised by perennial algae         |
|    | AA.A1C5 | Baltic photic rock and boulder dominated by perennial filamentous algae |
|    | AA.A1E  | Baltic photic rock and boulder characterised by epibenthic bivalves     |
|    | AA.A1E1 | Baltic photic rock and boulder dominated by mytilidae                   |
|    | AA.A1G  | Baltic photic rock and boulder characterized by cniderians              |
|    | AA.A1G1 | Baltic photic rock and boulder dominated by cniderians                  |
|    | AA.A1V  | Baltic photic rock and boulder mixed epibenthic community               |
|    | AA.A2T  | Baltic photic rock and boulder sparse epibenthic community              |
|    | AA.B1C  | Baltic photic hard clay characterised by perennial algae                |
|    | AA.B1C5 | Baltic photic hard clay dominated by perennial filamentous algae        |
|    | AA.B1E  | Baltic photic hard clay characterised by epibenthic bivalves            |
|    | AA.B1E1 | Baltic photic hard clay dominated by mytilidae                          |
|    | AA.B1G  | Baltic photic hard clay characterized by cniderians                     |
|    | AA.B1G1 | Baltic photic hard clay dominated by cniderians                         |
|    | AA.B1V  | Baltic photic hard clay mixed epibenthic community                      |
|    | AA.B2T  | Baltic photic hard clay sparse epibenthic community                     |
|    | AA.I1C  | Baltic photic coarse substrate characterised by perennial algae         |
|    | AA.I1C5 | Baltic photic coarse substrate dominated by perennial filamentous algae |
|    | AA.I1E  | Baltic photic coarse substrate characterised by epibenthic bivalves     |
|    | AA.I1E1 | Baltic photic coarse substrate dominated by mytilidae                   |
|    | AA.I1G  | Baltic photic coarse substrate characterized by cniderians              |
|    | AA.I1S  | Baltic photic coarse substrate characterised by annual algae            |
|    | AA.I1S1 | Baltic photic coarse substrate dominated by annual algae                |
|   | AA.I1V  | Baltic photic coarse substrate mixed epibenthic community               |
|  | AA.I2T  | Baltic photic coarse substrate sparse epibenthic community              |
|  | AA.I4U  | Baltic photic coarse substrate no epibenthic community                  |
|  | AA.J1C  | Baltic photic sand characterised by perennial algae                     |
|  | AA.J1E  | Baltic photic sand characterised by epibenthic bivalves                 |
|  | AA.J1E1 | Baltic photic sand dominated by mytilidae                               |
|  | AA.J1G  | Baltic photic sand characterized by cniderians                          |
|  | AA.J1S  | Baltic photic sand characterised by annual algae                        |
|  | AA.J1V  | Baltic photic sand mixed epibenthic community                           |
|  | AA.J2T  | Baltic photic sand sparse epibenthic community                          |
|  | AA.J4U  | Baltic photic sand no epibenthic community                              |
|  | AA.M1C  | Baltic photic mixed characterised by perennial algae                    |
|  | AA.M1C5 | Baltic photic mixed dominated by perennial filamentous algae            |
|  | AA.M1E  | Baltic photic mixed characterised by epibenthic bivalves                |
|  | AA.M1E1 | Baltic photic mixed dominated by mytilidae                              |
|  | AA.M1G  | Baltic photic mixed characterized by cniderians                         |
|  | AA.M1G1 | Baltic photic mixed dominated by cniderians                             |
|  | AA.M1H  | Baltic photic mixed characterised by moss animals                       |
|  | AA.M1S  | Baltic photic mixed characterised by annual algae                       |
|  | AA.M1S1 | Baltic photic mixed dominated by annual algae                           |
|  | AA.M1V  | Baltic photic mixed mixed epibenthic community                          |
|  | AA.M2T  | Baltic photic mixed sparse epibenthic community                         |
|  | AB.A1E  | Baltic aphotic rock and boulder characterised by epibenthic bivalves    |
|  | AB.A1G  | Baltic aphotic rock and boulder characterized by cniderians             |
|  | AB.A1V  | Baltic aphotic rock and boulder mixed epibenthic community              |
|  | AB.B1V  | Baltic aphotic hard clay mixed epibenthic community                     |
|  | AB.B2T  | Baltic aphotic hard clay sparse epibenthic community                    |
|  | AB.I2T  | Baltic aphotic coarse substrate sparse epibenthic community             |
|  | AB.I4U  | Baltic aphotic coarse substrate no epibenthic community                 |
|  | AB.J2T  | Baltic aphotic sand sparse epibenthic community                         |
|  | AB.J4U  | Baltic aphotic sand no epibenthic community                             |
|  | AB.M1E  | Baltic aphotic mixed characterised by epibenthic bivalves               |
|  | AB.M1G  | Baltic aphotic mixed characterized by cniderians                        |
|  | AB.M1V  | Baltic aphotic mixed mixed epibenthic community                         |
|  | AB.M4U  | Baltic aphotic mixed no epibenthic community                            |
